# Supplementary material
Source: PubMed Central journal article supplement (PMC2141840)

**A**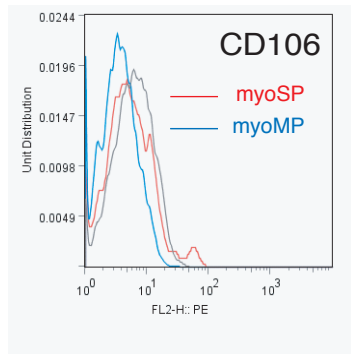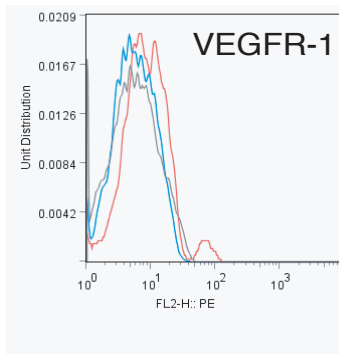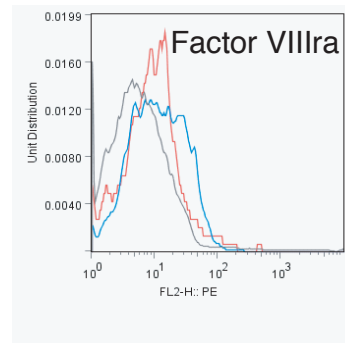**B**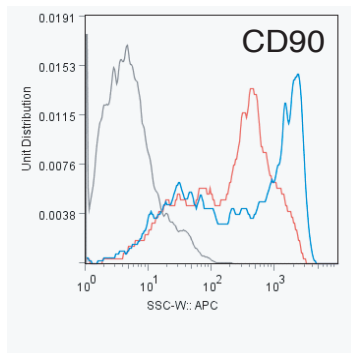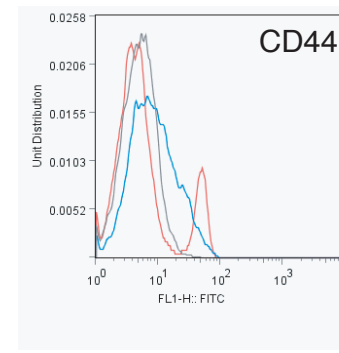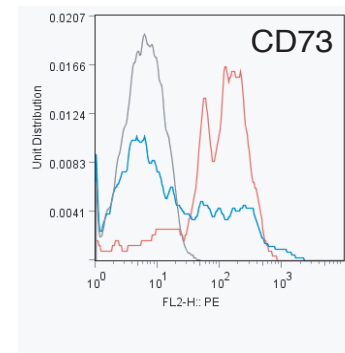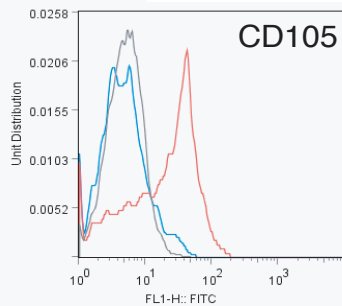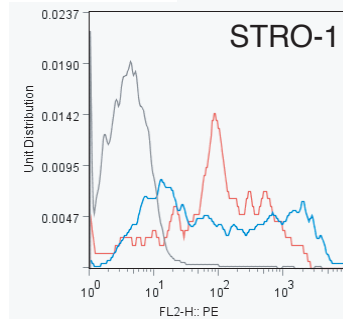

Supplement: pnas_0704472104_1.pdf [file pnas_0704472104_1.pdf]

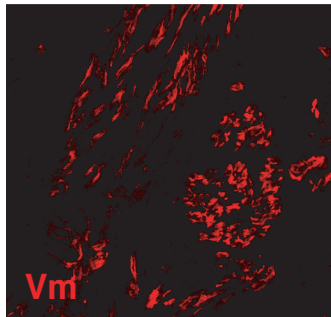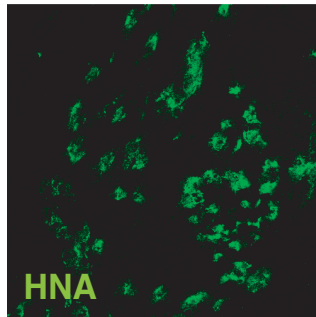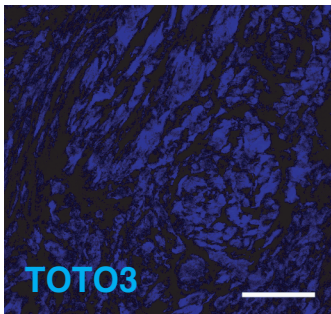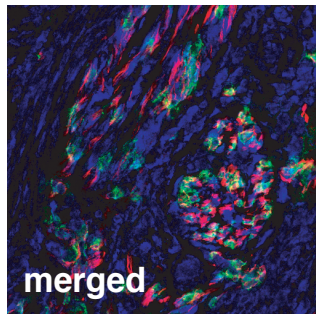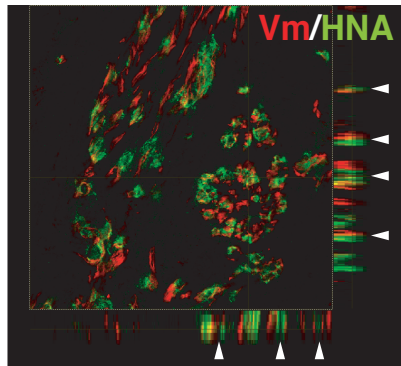

Supplement: pnas_0704472104_2.pdf [file pnas_0704472104_2.pdf]

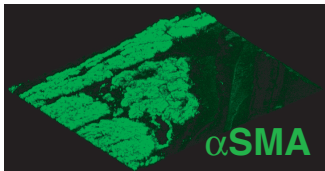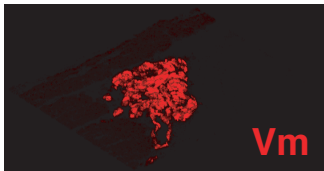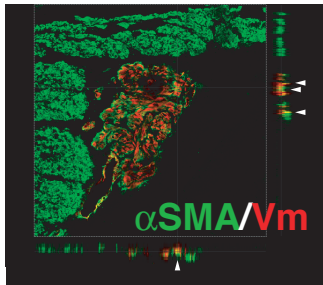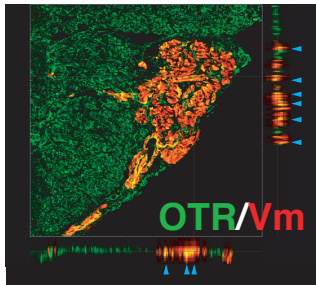

Supplement: pnas_0704472104_3.pdf [file pnas_0704472104_3.pdf]

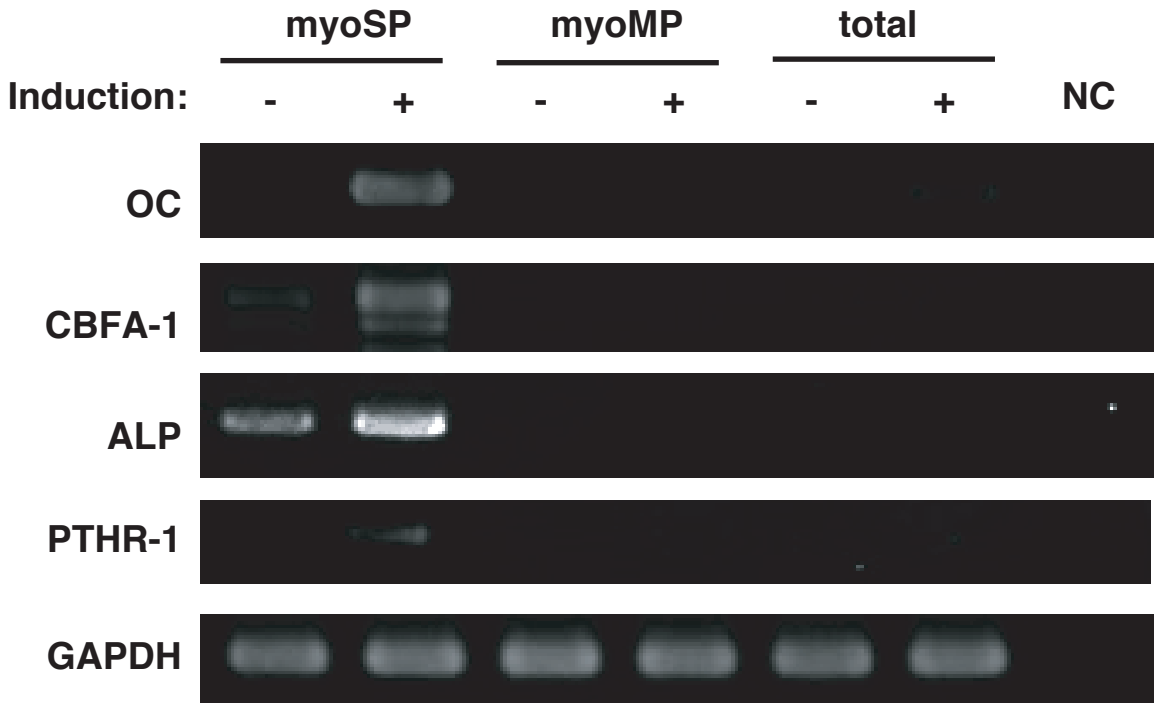

Supplement: pnas_0704472104_4.pdf [file pnas_0704472104_4.pdf]

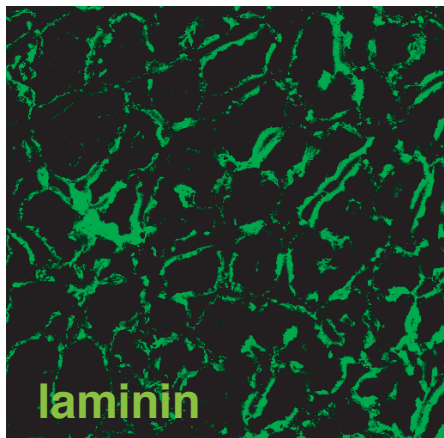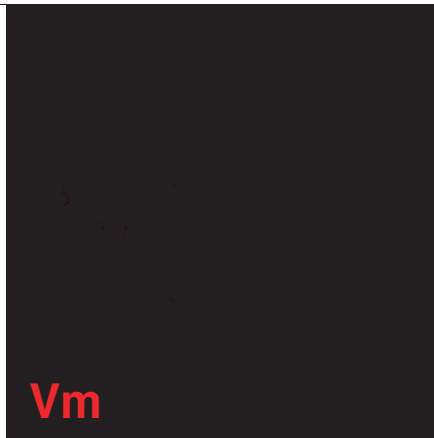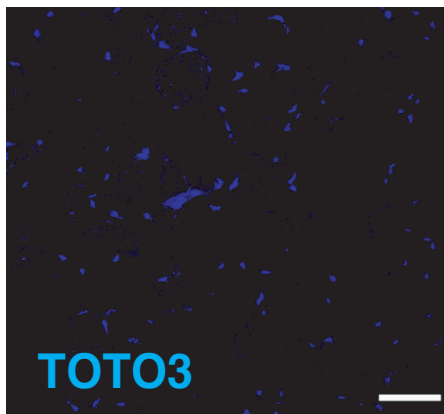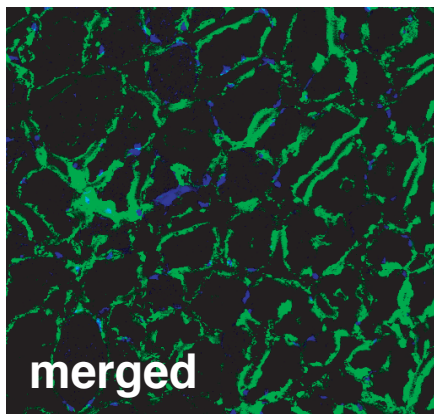

Supplement: pnas_0704472104_5.pdf [file pnas_0704472104_5.pdf]
